# Supplementary material
Source: PubMed Central journal article supplement (PMC6142943)
Supplement: jamaophthalmol-136-875-s001.pdf [file jamaophthalmol-136-875-s001.pdf]

## Supplementary Online Content

Lorés-Motta L, Riaz M, Grunin M, et al. Association of genetic variants with response to anti-vascular endothelial growth factor therapy in age-related macular degeneration. *JAMA Ophthalmol*. Published online May 31, 2018. doi:10.1001/jamaophthalmol.2018.2019

**eMethods.** Inclusion criteria for study participants

**eTable 1.** Association of baseline variables with response to anti-vascular endothelial growth factor therapy in neovascular age-related macular degeneration

**eTable 2.** Single-variant association analyses of lead variants in the discovery and replication phases by cohort

**eTable 3.** Single-variant association analysis of variants previously associated with response to anti-vascular endothelial growth factor therapy in neovascular age-related macular degeneration

**eTable 4.** Single-variant association analysis of variants previously associated with age-related macular degeneration

**eTable 5.** Rare protein-altering variants in *C10orf88* and *UNC93B1* included in the gene-based analysis

**eTable 6.** Gene-based analysis of rare variants in genes previously associated with age-related macular degeneration

**eFigure.** Q-Q plot of the single-variant association analysis of response to anti-vascular endothelial growth factor therapy in neovascular age-related macular degeneration

This supplementary material has been provided by the authors to give readers additional information about their work.

**eMethods.** Inclusion criteria for study participants

Inclusion criteria for all study center patients were defined as neovascularization secondary to AMD confirmed by fluorescein angiogram or optical coherence tomography, age greater or equal to 50 years, and a loading dose of three consecutive injections of bevacizumab (Hoffmann-La Roche, Basel, Switzerland) or ranibizumab (Hoffmann-La Roche, Basel, Switzerland / Novartis Basel, Switzerland) therapy at monthly intervals ( $\pm$  two weeks). No patients included in the study were treated with aflibercept at the time of study recruitment. We excluded eyes with other retinal morbidities such as myopia greater than 8 diopters, ocular surgery during follow-up or in the two months prior to treatment, previous treatment for neovascular disease, macular hole, staphyloma, or a visual acuity (VA) lower than 2.3 logMAR or 0 Early Treatment Diabetic Retinopathy Study (ETDRS) score letters.

**eTable 1.** Association of baseline variables with response to anti-vascular endothelial growth factor therapy in neovascular age-related macular degeneration

|                                                                            | Discovery phase (n=678) |                       |             |                       |                       | Replication phase (n=1,380) |                       |                       |                       |                        |                       | Total (n=2,058)        |
|----------------------------------------------------------------------------|-------------------------|-----------------------|-------------|-----------------------|-----------------------|-----------------------------|-----------------------|-----------------------|-----------------------|------------------------|-----------------------|------------------------|
|                                                                            | Cologne                 | Jerusalem             | Nijmegen    | Melbourne             | Sydney                | Jerusalem                   | Melbourne             | Leeds                 | BRAMD                 | IVAN                   | EUGENDA               |                        |
| <b>N</b>                                                                   | 155                     | 113                   | 121         | 119                   | 170                   | 146                         | 88                    | 220                   | 215                   | 542                    | 169                   |                        |
| <b>Sex, male</b><br>( $\beta$ (SE) in ETDRS letters)                       | 1.3 (2.2)               | -9.3 (4.3)            | -0.04 (2.5) | -0.9 (2)              | 1 (2.4)               | -1.4 (2.7)                  | -2.5 (2.7)            | -2.5 (1.3)            | -2.7 (1.2)            | 0.6 (1)                | -1.7 (1.6)            | -1 (0.6)               |
| <b>Sex</b><br>(P-value)                                                    | 0.558                   | 0.035                 | 0.989       | 0.656                 | 0.686                 | 0.616                       | 0.364                 | 0.057                 | 0.021                 | 0.556                  | 0.316                 | 0.087                  |
| <b>Baseline VA</b><br>in ETDRS letters<br>( $\beta$ (SE) in ETDRS letters) | 0.2 (0.06)              | 0.4 (0.07)            | 0.2 (0.07)  | 0.3 (0.06)            | 0.3 (0.06)            | 0.4 (0.05)                  | 0.3 (0.06)            | 0.3 (0.04)            | 0.2 (0.04)            | 0.3 (0.03)             | 0.2 (0.04)            | 0.3 (0.01)             |
| <b>Baseline VA</b><br>(P-value)                                            | 0.001                   | 2.03x10 <sup>-8</sup> | 0.004       | 7.17x10 <sup>-7</sup> | 7.00x10 <sup>-6</sup> | 7.33x10 <sup>-12</sup>      | 4.04x10 <sup>-7</sup> | 3.36x10 <sup>-8</sup> | 1.22x10 <sup>-4</sup> | 5.53x10 <sup>-18</sup> | 1.38x10 <sup>-4</sup> | 3.41x10 <sup>-71</sup> |
| <b>Age, years</b><br>( $\beta$ (SE) in ETDRS letters)                      | -0.4 (0.1)              | -0.3 (0.3)            | -0.4 (0.2)  | -0.2 (0.1)            | -0.3 (0.1)            | -0.5 (0.2)                  | -0.2 (0.2)            | -0.2 (0.1)            | -0.04 (0.1)           | -0.04 (0.1)            | -0.2 (0.1)            | -0.2 (0.04)            |
| <b>Age</b><br>(P-value)                                                    | 0.016                   | 0.275                 | 0.041       | 0.140                 | 0.077                 | 0.002                       | 0.286                 | 0.138                 | 0.610                 | 0.579                  | 0.061                 | 8.55x10 <sup>-7</sup>  |

Influence of the variables age and baseline VA on the change in VA after 3 months was assessed including these variables in a general linear model.

ETDRS = Early Treatment Diabetic Retinopathy Study Cologne = University Hospital of Cologne, Cologne; Jerusalem = Hadassah-Hebrew University Medical Center, Jerusalem; Nijmegen = Radboud university medical center, Nijmegen; Melbourne = Centre for Eye Research Australia, Melbourne; Sydney = Centre for Vision Research, Sydney; Leeds = St. James's University Hospital, Leeds; BRAMD = BRAMD trial cohort, IVAN = alternative treatments to Inhibit VEGF in Age-related choroidal Neovascularisation (IVAN) trial cohort, EUGENDA = European Genetic Database study cohort; N = number; VA = visual acuity.

**eTable 2.** Single-variant association analyses of lead variants in the discovery and replication phases by cohort

|             | Cohort    | chr1 rs12138564 |                  |                       | chr2 rs13002976 |                   |         | chr3 rs241692 |                   |         | chr7 rs2237435 |                   |         | chr17 rs242939 |                   |         |
|-------------|-----------|-----------------|------------------|-----------------------|-----------------|-------------------|---------|---------------|-------------------|---------|----------------|-------------------|---------|----------------|-------------------|---------|
|             |           | MAF             | $\beta$ (SE)     | P-value               | MAF             | $\beta$ (SE)      | P-value | MAF           | $\beta$ (SE)      | P-value | MAF            | $\beta$ (SE)      | P-value | MAF            | $\beta$ (SE)      | P-value |
| Discovery   | Cologne   | 0.312           | 0.052<br>(0.031) | 0.093                 | 0.409           | -0.025<br>(0.031) | 0.436   | 0.067         | 0.188<br>(0.069)  | 0.007   | 0.287          | -0.084<br>(0.035) | 0.018   | 0.074          | 0.041<br>(0.058)  | 0.485   |
|             | Jerusalem | 0.275           | 0.006<br>(0.072) | 0.935                 | 0.384           | -0.132<br>(0.073) | 0.075   | 0.092         | 0.331<br>(0.114)  | 0.004   | 0.276          | -0.054<br>(0.086) | 0.528   | 0.088          | 0.288<br>(0.120)  | 0.018   |
|             | Nijmegen  | 0.309           | 0.088<br>(0.040) | 0.031                 | 0.410           | -0.123<br>(0.036) | 0.001   | 0.051         | 0.233<br>(0.098)  | 0.019   | 0.275          | -0.13<br>(0.041)  | 0.002   | 0.094          | 0.178<br>(0.064)  | 0.007   |
|             | Melbourne | 0.251           | 0.113<br>(0.028) | 1.04x10 <sup>-4</sup> | 0.387           | -0.081<br>(0.030) | 0.009   | NA*           | NA*               | NA*     | 0.291          | -0.072<br>(0.033) | 0.032   | 0.079          | 0.151<br>(0.051)  | 0.004   |
|             | Sydney    | 0.315           | 0.073<br>(0.035) | 0.036                 | 0.358           | -0.096<br>(0.038) | 0.012   | 0.068         | 0.178<br>(0.077)  | 0.022   | 0.304          | -0.048<br>(0.039) | 0.217   | 0.104          | 0.111<br>(0.051)  | 0.030   |
| Replication | Jerusalem | 0.459           | 0.427<br>(1.141) | 0.709                 | 0.398           | 1.69<br>(1.331)   | 0.207   | NA^           | NA^               | NA^     | 0.337          | 0.443<br>(1.183)  | 0.709   | 0.092          | 0.503<br>(1.654)  | 0.761   |
|             | Melbourne | 0.268           | 0.025<br>(0.045) | 0.583                 | NA^             | NA^               | NA^     | 0.080         | -0.113<br>(0.068) | 0.099   | 0.288          | -0.024<br>(0.04)  | 0.554   | 0.080          | -0.007<br>(0.075) | 0.921   |
|             | Leeds     | 0.306           | 0.044<br>(0.020) | 0.028                 | 0.420           | 0.014<br>(0.018)  | 0.460   | 0.053         | -0.025<br>(0.042) | 0.561   | 0.276          | 0.029<br>(0.02)   | 0.162   | 0.063          | 0.047<br>(0.038)  | 0.214   |
|             | BRAMD     | 0.285           | 0.016<br>(0.019) | 0.379                 | 0.404           | 0.007<br>(0.017)  | 0.704   | 0.051         | -0.041<br>(0.038) | 0.287   | 0.273          | 0.028<br>(0.019)  | 0.138   | 0.079          | -0.052<br>(0.031) | 0.094   |
|             | IVAN      | 0.311           | 0.009<br>(0.014) | 0.515                 | 0.428           | 0.002<br>(0.014)  | 0.892   | 0.067         | 0.021<br>(0.027)  | 0.442   | 0.282          | 0.009<br>(0.015)  | 0.556   | 0.070          | -0.04<br>(0.027)  | 0.131   |
|             | EUGENDA   | 0.270           | 0.017<br>(0.025) | 0.498                 | 0.363           | 0.044<br>(0.023)  | 0.061   | 0.067         | -0.075<br>(0.044) | 0.089   | 0.249          | 0.001<br>(0.024)  | 0.968   | 0.051          | 0.009<br>(0.052)  | 0.855   |

Cologne = University Hospital of Cologne, Cologne; Jerusalem = Hadassah-Hebrew University Medical Center, Jerusalem; Nijmegen = Radboud university medical center, Nijmegen; Melbourne = Centre for Eye Research Australia, Melbourne; Sydney = Centre for Vision Research, Sydney; Leeds = St. James's University Hospital, Leeds; BRAMD = BRAMD trial cohort, IVAN = alternative treatments to Inhibit VEGF in Age-related choroidal Neovascularisation (IVAN) trial cohort, EUGENDA = European Genetic Database study cohort; chr = chromosome; MAF = Minor allele frequency; SE = Standard error; NA = Not applicable

\*Not included due to MAF <0.05, ^ Not included due to call rate <0.9

**eTable 3.** Single-variant association analysis of variants previously associated with response to anti-vascular endothelial growth factor therapy in neovascular age-related macular degeneration

| Study                                                                                                                                                                                                                                                                                                                                                                    | Chr. | Position <sup>a</sup> | SNP                     | Gene <sup>b</sup> | Allele | P-value Cologne | P-value Nijmegen | P-value Jerusalem | P-value Melbourne | P-value Sydney | β (SE) Meta-analysis | P-value Meta-analysis |
|--------------------------------------------------------------------------------------------------------------------------------------------------------------------------------------------------------------------------------------------------------------------------------------------------------------------------------------------------------------------------|------|-----------------------|-------------------------|-------------------|--------|-----------------|------------------|-------------------|-------------------|----------------|----------------------|-----------------------|
| Wickremasinghe SS et al., 2011; Bakbak B et al., 2015*                                                                                                                                                                                                                                                                                                                   | 19   | 45,412,079            | rs7412                  | APOE              | T      | 0.935           | 0.715            | 0.453             | 0.185             | 0.178          | -0.003 (0.027)       | 0.926                 |
| Wickremasinghe SS et al., 2011; Bakbak B et al., 2015*                                                                                                                                                                                                                                                                                                                   | 19   | 45411941              | rs429358                | APOE              | C      | 0.111           | 0.696            | 0.996             | 0.203             | 0.434          | 0.055 (0.027)        | 0.043                 |
| Brantley MA et al., 2007; Imai D et al., 2010*; Kloeckener-Gruissem B et al., 2011; Nischler C et al., 2011; McKibbin M et al., 2012; Smailhodzic D et al., 2012; Menghini M et al., 2012; Tian J et al., 2012*; Hautamaki A et al., 2014; Matsumiya W et al., 2014*; Veloso CE et al., 2014; Piermarocchi S et al., 2015; Medina F et al., 2015*; Shah AR et al., 2016. | 1    | 196,659,237           | rs1061170               | CFH               | T      | 0.074           | 0.446            | 0.984             | 0.397             | 0.546          | 0.028 (0.015)        | 0.059                 |
| Teper SJ et al., 2010; McKibbin M et al., 2012; Kang HK et al., 2012*; Tian J et al., 2012*; Abedi F et al., 2013; Kitchens JW et al., 2013; Valverde-Megías A et al., 2017                                                                                                                                                                                              | 10   | 124,220,544           | rs11200638 <sup>#</sup> | HTRA1             | A      | 0.141           | 0.729            | 0.892             | 0.790             | 0.864          | 0.011 (0.014)        | 0.416                 |
| Hautamaki A et al., 2013; Hautamaki A et al., 2014; Lazzeri S et al., 2015                                                                                                                                                                                                                                                                                               | 4    | 74,606,024            | rs4073                  | CXCL8             | T      | 0.403           | 0.814            | 0.532             | 0.325             | 0.921          | 0.014 (0.016)        | 0.390                 |
| Imai D et al., 2010*                                                                                                                                                                                                                                                                                                                                                     | 17   | 1,673,276             | rs1136287               | SERPINF1          | T      | 0.615           | 0.330            | 0.152             | 0.625             | 0.154          | 0.019 (0.016)        | 0.226                 |
| Wang VM et al., 2012                                                                                                                                                                                                                                                                                                                                                     | 4    | 110,638,810           | rs2285714               | PLA2G12A          | T      | 0.849           | 0.852            | 0.708             | 0.805             | 0.109          | -0.014 (0.015)       | 0.368                 |
| Nakata I et al., 2011*                                                                                                                                                                                                                                                                                                                                                   | 6    | 43,732,669            | rs699946                | VEGFA             | G      | 0.377           | 0.141            | 0.614             | 0.819             | 0.297          | -0.007 (0.019)       | 0.687                 |
| Imai D et al., 2010*; Lazzeri S et al., 2013; Cruz-Gonzalez F et al., 2014; Hautamaki A et al., 2014                                                                                                                                                                                                                                                                     | 6    | 43,736,389            | rs699947 <sup>^</sup>   | VEGFA             | C      | 0.479           | 0.087            | 0.613             | 0.838             | 0.972          | -0.008 (0.015)       | 0.581                 |
| Abedi F et al., 2013; Chang W et al., 2013*                                                                                                                                                                                                                                                                                                                              | 6    | 43,742,579            | rs833069 <sup>~</sup>   | VEGFA             | C      | 0.933           | 0.539            | 0.784             | 0.460             | 0.435          | 0.009                | 0.559                 |

|                                       |    |            |                        |               |   |       |       |       |       |       |                   |       |
|---------------------------------------|----|------------|------------------------|---------------|---|-------|-------|-------|-------|-------|-------------------|-------|
|                                       |    |            |                        |               |   |       |       |       |       |       | (0.015)           |       |
| Zhao L et al., 2013                   | 6  | 43,826,627 | rs943080               | <i>VEGFA</i>  | T | 0.452 | 0.571 | 0.467 | 0.558 | 0.918 | -0.010<br>(0.015) | 0.492 |
| Hermann MM et al., 2014               | 4  | 55,986,238 | rs4576072 <sup>+</sup> | <i>KDR</i>    | C | NA    | NA    | NA    | NA    | NA    | NA                | NA    |
| Hermann MM et al., 2014               | 4  | 55,966,801 | rs6828477              | <i>KDR</i>    | T | 0.337 | 0.554 | 0.950 | 0.696 | 0.773 | 0.012<br>(0.016)  | 0.433 |
| Lazzeri S et al., 2015                | 4  | 55,992,366 | rs2071559              | <i>KDR</i>    | G | 0.975 | 0.306 | 0.435 | 0.723 | 0.005 | 0.009<br>(0.015)  | 0.555 |
| Lorés-Motta L et al., 2016            | 10 | 33,552,695 | rs2070296              | <i>NRP1</i>   | T | 0.847 | 0.204 | 0.561 | 0.509 | 0.018 | -0.031<br>(0.021) | 0.136 |
| Riaz M and Lorés-Motta L et al., 2016 | 11 | 4,389,639  | rs4910623              | <i>OR52B4</i> | A | 0.185 | 0.161 | 0.756 | 0.158 | 0.126 | 0.022<br>(0.015)  | 0.155 |

SNP = Single nucleotide polymorphism, Cologne = University Hospital of Cologne, Cologne; Jerusalem = Hadassah-Hebrew University Medical Center, Jerusalem; Nijmegen = Radboud university medical center, Nijmegen; Melbourne = Centre for Eye Research Australia, Melbourne; Sydney = Centre for Vision Research, Sydney; Leeds = St. James's University Hospital, Leeds; BRAMD = BRAMD trial cohort, IVAN = alternative treatments to Inhibit VEGF in Age-related choroidal Neovascularisation (IVAN) trial cohort; EUGENDA = European Genetic Database study cohort; SE = Standard error; NA = Not applicable

<sup>a</sup>Chromosomal position according to the NCBI RefSeq hg19 human genome reference assembly. <sup>b</sup>Closest gene. \* Association identified in a non-European descent population. <sup>+</sup>Variant did not pass imputation quality control. <sup>#</sup>In linkage disequilibrium ( $r^2 > 0.9$ ) with rs10490924. <sup>^</sup>In linkage disequilibrium ( $r^2 > 0.9$ ) with rs833061 and rs1413711. <sup>~</sup>In linkage disequilibrium ( $r^2 > 0.9$ ) with rs3025000.

**eTable 4.** Single-variant association analysis of variants previously associated with age-related macular degeneration

| Locus name                               | Variant <sup>a</sup> | Allele | P-value<br>Cologne | P-value<br>Nijmegen | P-value<br>Jerusalem | P-value<br>Melbourne | P-value<br>Sydney | β (SE)<br>Meta-analysis | P-value<br>Meta-analysis |
|------------------------------------------|----------------------|--------|--------------------|---------------------|----------------------|----------------------|-------------------|-------------------------|--------------------------|
| <i>CFH</i>                               | rs10922109           | C      | 0.536              | 0.575               | 0.702                | 0.585                | 0.355             | -0.013 (0.018)          | 0.454                    |
| <i>CFH</i>                               | rs570618             | G      | 0.074              | 0.435               | 1.000                | 0.414                | 0.546             | 0.028 (0.015)           | 0.060                    |
| <i>CFH</i>                               | rs121913059          | NF     | NF                 | NF                  | NF                   | NF                   | NF                | NF                      | NF                       |
| <i>CFH</i>                               | rs148553336          | NF     | NF                 | NF                  | NF                   | NF                   | NF                | NF                      | NF                       |
| <i>CFH</i>                               | rs187328863          | C      | 0.017              | 0.686               | 0.109                | 0.186                | 0.472             | 0.068 (0.039)           | 0.077                    |
| <i>CFH (CFHR3/CFHR1)</i> <sup>b</sup>    | rs61818925           | G      | 0.297              | 0.549               | 0.594                | 0.150                | 0.737             | -0.019 (0.017)          | 0.275                    |
| <i>CFH</i>                               | rs35292876           | C      | 0.013              | 0.379               | 0.736                | 0.105                | 0.707             | 0.029 (0.042)           | 0.487                    |
| <i>CFH</i>                               | rs191281603          | NF     | NF                 | NF                  | NF                   | NF                   | NF                | NF                      | NF                       |
| <i>COL4A3</i>                            | rs11884770           | C      | 0.719              | 0.329               | 0.962                | 0.627                | 0.477             | 0.007 (0.018)           | 0.689                    |
| <i>ADAMTS9-AS2</i>                       | rs62247658           | C      | 0.716              | 0.552               | 0.866                | 0.058                | 0.452             | 0.028 (0.015)           | 0.056                    |
| <i>COL8A1</i>                            | rs140647181          | C      | 0.327              | 0.061               | 0.389                | 0.089                | 0.774             | -0.112 (0.049)          | 0.022                    |
| <i>COL8A1</i>                            | rs55975637           | G      | 0.951              | 0.541               | 0.607                | 0.088                | 0.388             | -0.022 (0.021)          | 0.310                    |
| <i>CFI</i>                               | rs10033900           | C      | 0.532              | 0.955               | 0.571                | 0.543                | 0.390             | -0.002 (0.016)          | 0.925                    |
| <i>CFI</i>                               | rs141853578          | NF     | NF                 | NF                  | NF                   | NF                   | NF                | NF                      | NF                       |
| <i>C9</i>                                | rs62358361           | G      | NF                 | 0.007               | 0.307                | 0.812                | 0.151             | -0.115 (0.076)          | 0.130                    |
| <i>PRLR/SPEF2</i>                        | rs114092250          | G      | 0.372              | 0.799               | NF                   | 0.272                | 0.614             | -0.029 (0.05)           | 0.565                    |
| <i>C2/CFB/SKIV2L</i>                     | rs116503776          | G      | 0.086              | 0.806               | 0.448                | 0.632                | 0.146             | -0.001 (0.027)          | 0.958                    |
| <i>C2/CFB/SKIV2L</i>                     | rs144629244          | G      | 0.500              | NF                  | 0.280                | NF                   | 0.523             | -0.05 (0.085)           | 0.558                    |
| <i>C2/CFB/SKIV2L (PBX2)</i> <sup>b</sup> | rs114254831          | G      | 0.416              | 0.811               | 0.148                | 0.014                | 0.271             | 0.036 (0.017)           | 0.033                    |
| <i>C2/CFB/SKIV2L</i>                     | rs181705462          | G      | 0.402              | NF                  | 0.927                | 0.482                | 0.209             | -0.046 (0.057)          | 0.422                    |
| <i>VEGFA</i>                             | rs943080             | NF     | NF                 | NF                  | NF                   | NF                   | NF                | NF                      | NF                       |
| <i>KMT2E/SRPK2</i>                       | rs1142               | C      | 0.941              | 0.406               | 0.955                | 0.668                | 0.396             | -0.005 (0.016)          | 0.751                    |
| <i>PILRB/PILRA</i>                       | rs7803454            | C      | 0.461              | 0.240               | 0.020                | 0.956                | 0.292             | 0.037 (0.019)           | 0.050                    |
| <i>TNFRSF10A</i>                         | rs79037040           | G      | 0.094              | 0.952               | 0.268                | 0.280                | 0.041             | 0.015 (0.016)           | 0.325                    |
| <i>MIR6130/RORB</i>                      | rs10781182           | G      | 0.498              | 0.646               | 0.220                | 0.209                | 0.777             | 0.005 (0.016)           | 0.729                    |

|                             |             |        |       |       |       |       |       |                |       |
|-----------------------------|-------------|--------|-------|-------|-------|-------|-------|----------------|-------|
| <i>TRPM3</i>                | rs71507014  | GC     | 0.696 | 0.074 | 0.401 | 0.780 | 0.753 | -0.017 (0.014) | 0.236 |
| <i>TGFBR1</i>               | rs1626340   | G      | 0.673 | 0.094 | 0.260 | 0.393 | 0.076 | 0.013 (0.02)   | 0.530 |
| <i>ABCA1</i>                | rs2740488   | C      | 0.305 | 0.999 | 0.019 | 0.774 | 0.177 | 0.009 (0.018)  | 0.631 |
| <i>ARHGAP21</i>             | rs12357257  | G      | 0.308 | 0.710 | 0.718 | 0.077 | 0.249 | -0.016 (0.017) | 0.372 |
| <i>ARMS2/HTRA1</i>          | rs3750846   | C      | 0.153 | 0.673 | 0.892 | 0.790 | 0.753 | 0.012 (0.014)  | 0.409 |
| <i>RDH5/CD63</i>            | rs3138141   | C      | 0.620 | 0.567 | 0.630 | 0.877 | 0.267 | 0.004 (0.023)  | 0.856 |
| <i>ACAD10</i>               | rs61941274  | G      | 0.203 | 0.699 | NF    | 0.367 | 0.017 | -0.014 (0.064) | 0.831 |
| <i>B3GALTL</i>              | rs9564692   | C      | 0.999 | 0.544 | 0.384 | 0.452 | 0.907 | -0.002 (0.017) | 0.913 |
| <i>RAD51B</i>               | rs61985136  | C      | 0.142 | 0.360 | 0.268 | 0.628 | 0.243 | -0.007 (0.016) | 0.672 |
| <i>RAD51B</i>               | rs2842339   | G      | 0.368 | 0.651 | 0.255 | 0.511 | 0.527 | -0.006 (0.024) | 0.820 |
| <i>LIPC</i>                 | rs2043085   | C      | 0.224 | 0.418 | 0.956 | 0.809 | 0.656 | -0.009 (0.015) | 0.536 |
| <i>LIPC</i>                 | rs2070895   | G      | 0.242 | 0.274 | 0.158 | 0.463 | 0.914 | 0.004 (0.018)  | 0.844 |
| <i>CETP</i>                 | rs5817082   | C      | 0.114 | 0.052 | 0.105 | 0.393 | 0.425 | 0.033 (0.018)  | 0.072 |
| <i>CETP</i>                 | rs17231506  | C      | 0.384 | 0.041 | 0.932 | 0.492 | 0.037 | -0.017 (0.016) | 0.286 |
| <i>CTRB2/CTRB1</i>          | rs72802342  | C      | 0.750 | 0.497 | 0.522 | 0.794 | 0.837 | -0.001 (0.035) | 0.973 |
| <i>TMEM97/VTN</i>           | rs11080055  | C      | 0.108 | 0.862 | 0.837 | 0.349 | 0.483 | 0.002 (0.015)  | 0.891 |
| <i>NPLOC4/TSPAN10</i>       | rs6565597   | C      | 0.188 | 0.977 | 0.036 | 0.047 | 0.885 | -0.021 (0.017) | 0.215 |
| <i>C3</i>                   | rs2230199   | G      | 0.554 | 0.671 | 0.886 | 0.725 | 0.291 | 0.002 (0.019)  | 0.897 |
| <i>C3</i>                   | rs147859257 | G      | NF    | NF    | NF    | 0.062 | NF    | -0.226 (0.12)  | 0.062 |
| <i>C3 (NRTN/FUT6) b</i>     | rs12019136  | G      | 0.219 | 0.572 | 0.435 | 0.953 | 0.023 | 0.02 (0.042)   | 0.633 |
| <i>CNN2</i>                 | rs67538026  | C      | 0.983 | 0.221 | 0.893 | 0.903 | 0.197 | 0 (0.017)      | 0.999 |
| <i>APOE</i>                 | rs429358    | C      | 0.111 | 0.696 | 0.996 | 0.203 | 0.434 | 0.055 (0.027)  | 0.043 |
| <i>APOE(EXOC3L2/MARK4)b</i> | rs73036519  | G      | 0.193 | 0.820 | 0.430 | 0.192 | 0.464 | -0.005 (0.018) | 0.787 |
| <i>MMP9</i>                 | rs142450006 | TTTTTC | 0.582 | 0.146 | 0.715 | 0.494 | 0.153 | 0.002 (0.024)  | 0.944 |
| <i>C20orf85</i>             | rs201459901 | TA     | 0.565 | 0.220 | 0.838 | 0.048 | 0.738 | -0.012 (0.034) | 0.723 |
| <i>SYN3/TIMP3</i>           | rs5754227   | C      | 0.390 | 0.313 | 0.010 | 0.689 | 0.706 | 0.015 (0.025)  | 0.553 |
| <i>SLC16A8</i>              | rs8135665   | C      | 0.405 | 0.602 | 0.354 | 0.731 | 0.898 | -0.003 (0.018) | 0.855 |

NF = Not found, SE = Standard error.

<sup>a</sup>Chromosomal location of the SNP as in Fritsche et al., 2016



**eTable 5.** Rare protein-altering variants in *C10orf88* and *UNC93B1* included in the gene-based analysis

| Gene            | Variant <sup>a</sup> | Protein change | Imputation quality (R <sup>2</sup> ) | CADD score <sup>b</sup> | RAC | Frequency (%) | Single variant P-value | β (SE)         |
|-----------------|----------------------|----------------|--------------------------------------|-------------------------|-----|---------------|------------------------|----------------|
| <i>C10orf88</i> | c.412G>A             | p.Glu138Lys    | 1                                    | 24.6                    | 3   | 0.4           | 4.96x10 <sup>-4</sup>  | -0.618 (0.177) |
|                 | c.827T>C             | p.Ile276Thr    | 1                                    | 0.038                   | 3   | 0.4           | 2.33x10 <sup>-5</sup>  | -0.749 (0.176) |
|                 | c.1258C>T            | p.Gln420*      | 1                                    | 38                      | 1   | 0.1           | 0.120                  | <0             |
| <i>UNC93B1</i>  | c.385C>A             | p.Leu129Ile    | 1                                    | 24.9                    | 7   | 1.0           | 3.33x10 <sup>-7</sup>  | -0.606 (0.118) |
|                 | c.626C>T             | p.Pro209Leu    | 1                                    | 25.6                    | 7   | 1.0           | 4.21x10 <sup>-7</sup>  | -0.596 (0.117) |

RAC = Rare allele count, SE = Standard error

<sup>a</sup>Positions according to the NCBI RefSeq hg19 human genome reference assembly. <sup>b</sup>The CADD score refers to the PHRED-like scaled C-score for which ≥20 indicates that the variant is predicted to be in the 1% most deleterious substitutions in the human genome.

**eTable 6.** Gene-based analysis of rare variants in genes previously associated with age-related macular degeneration

| <b>Gene</b>    | <b>Chromosome</b> | <b>Chromosomal position<sup>a</sup></b> | <b>N rare variants</b> | <b>RAC</b> | <b>P-value</b> |
|----------------|-------------------|-----------------------------------------|------------------------|------------|----------------|
| <i>CFH</i>     | 1                 | 196,621,252-196,716,375                 | 14                     | 40         | 0.541          |
| <i>CFI</i>     | 4                 | 110,662,068-110,723,117                 | 10                     | 26         | 0.026          |
| <i>TIMP3</i>   | 22                | 33,198,100-33,255,356                   | 2                      | 4          | 0.163          |
| <i>SLC16A8</i> | 22                | 38,474,406-38,478,804                   | 5                      | 21         | 0.007          |

N = number, RAC = rare allele count

<sup>a</sup>Chromosome and chromosomal position according to the NCBI RefSeq hg19 human

**eFigure.** Q-Q plot of the single-variant association analysis of response to anti-vascular endothelial growth factor therapy in neovascular age-related macular degeneration

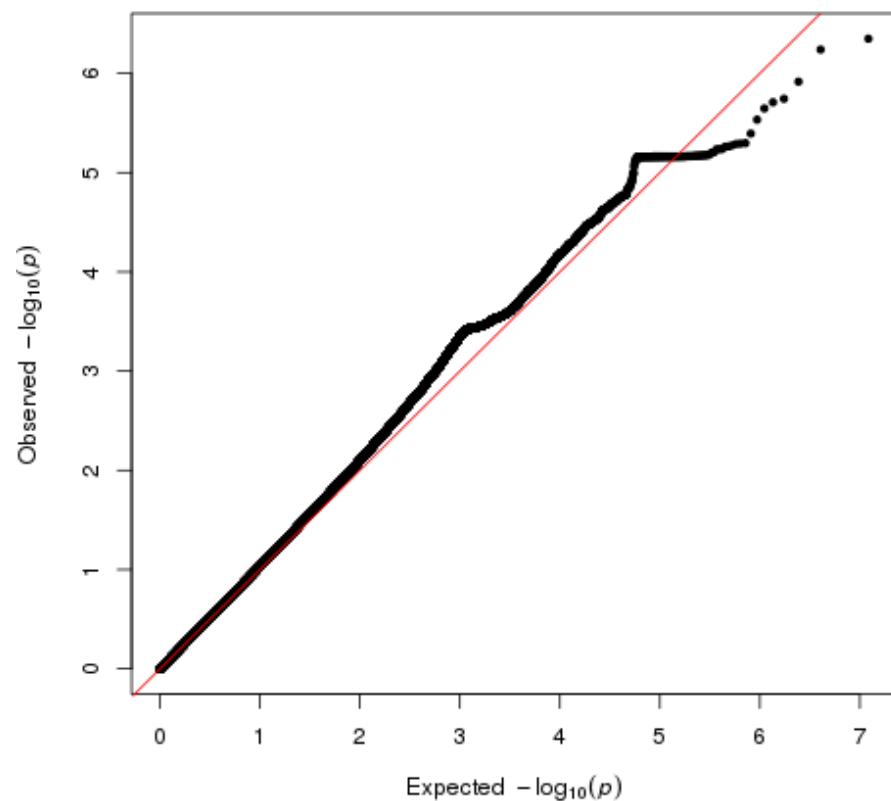

Shown as black dots are the observed  $P$ -values ( $-\log_{10}(p)$ ) compared to those expected under the null hypothesis. In the meta-analysis, adjustment for the inflation factor of the different cohorts was conducted when  $\lambda > 1$  (University Hospital of Cologne cohort  $\lambda = 1.020$ , Hadassah-Hebrew UMC cohort  $\lambda = 0.99$ , Radboud umc cohort  $\lambda = 1.001$ , Centre for Eye Research Australia cohort  $\lambda = 1.005$  and Centre for Vision Research cohort  $\lambda = 1.005$ ).
